# Supplementary material for: Dynamic assembly of DNA-ceria nanocomplex in living cells generates artificial peroxisome
Source: PubMed Central journal article supplement (PMC9751304; doi:10.1038/s41467-022-35472-2), 2022-12-14
Supplement: 41467_2022_35472_MOESM1_ESM.pdf [file 41467_2022_35472_MOESM1_ESM.pdf]

## Supplementary Information

### Dynamic assembly of DNA-ceria nanocomplex in living cells generates artificial peroxisome

Chi Yao<sup>1,2,#,\*</sup>, Yuwei Xu<sup>1,#</sup>, Jianpu Tang<sup>1,#</sup>, Pin Hu<sup>1</sup>, Hedong Qi<sup>1</sup>, Dayong Yang<sup>1,2,\*</sup>

<sup>1</sup> Frontiers Science Center for Synthetic Biology, Key Laboratory of Systems Bioengineering (MOE), Institute of Biomolecular and Biomedical Engineering, School of Chemical Engineering and Technology, Tianjin University, Tianjin, 300350, P.R. China.

<sup>2</sup> Zhejiang Institute of Tianjin University, Ningbo, Zhejiang, 315200, P.R. China.

\*Corresponding authors: dayong.yang@tju.edu.cn; chi.yao@tju.edu.cn

#These authors contributed equally to this work.

**Keywords:** DNA nanotechnology, artificial organelle, i-motif DNA, reactive oxygen species

**Contents:**

**Supplementary Figures 1-32**

**Supplementary Table 1**

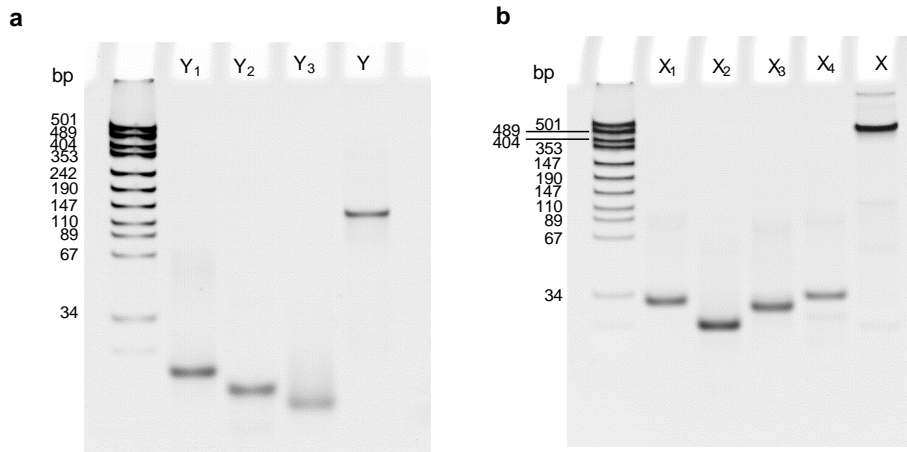

**Supplementary Fig. 1.** Polyacrylamide gel electrophoresis (12%) to verify the synthesis of Y-shaped DNA (**a**) and X-shaped DNA (**b**).

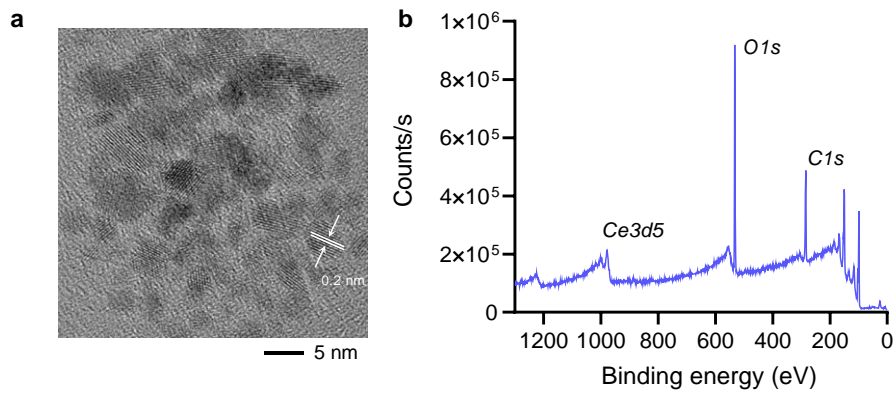

**Supplementary Fig. 2. Characterization of ceria.** **a**, Representative transmission electron microscopy image of ceria. **b**, X-ray photoelectron spectroscopy analysis of ceria.

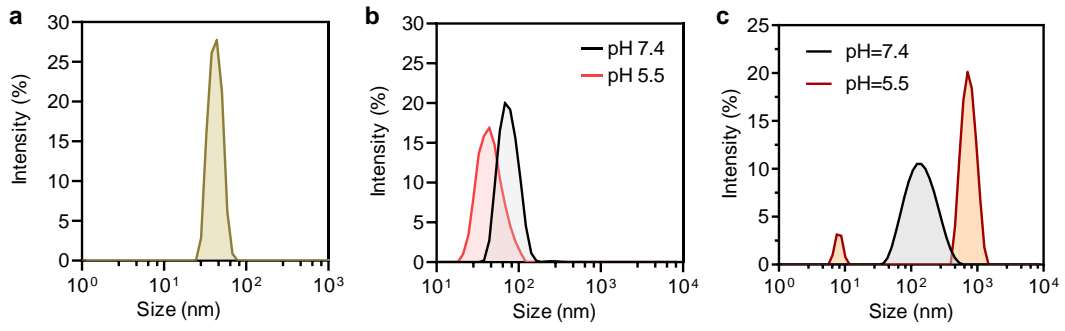

**Supplementary Fig. 3. Dynamic light scattering (DLS) analysis.** **a**, DLS analysis of DAS at pH 7.4. **b**, DLS analysis of D<sub>ni</sub>CNC at pH 7.4 and pH 5.5, respectively. **c**, DLS analysis of DCNC in cell culture media at pH 7.4 and pH 5.5, respectively.

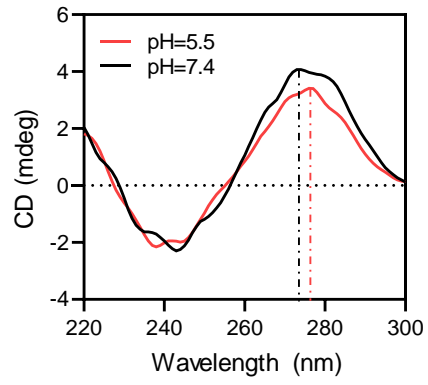

**Supplementary Fig. 4.** Circular dichroism (CD) spectra of DCNC at pH 7.4 and pH 5.5, respectively.

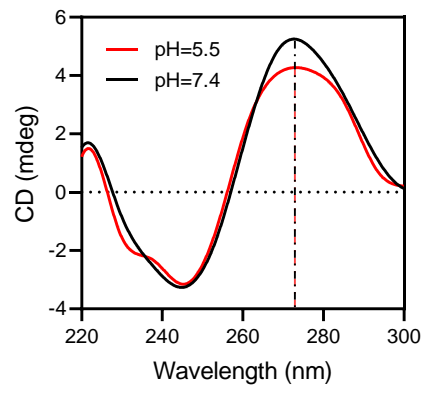

**Supplementary Fig. 5.** CD spectra of D<sub>mi</sub>CNC at pH 7.4 and pH 5.5, respectively.

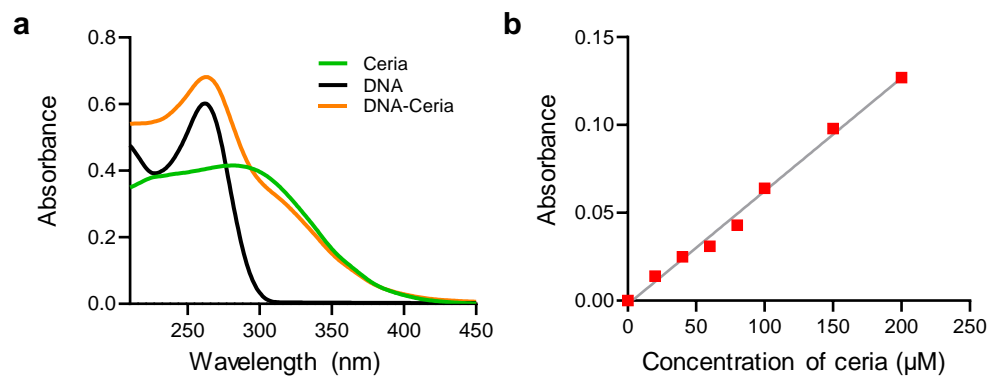

**Supplementary Fig. 6. Calibration curve of absorbance vs. concentration of ceria. a,** Absorbance spectra of ceria, DNA and DNA-ceria. **b,** The calibration curve of absorbance vs. concentration of ceria.



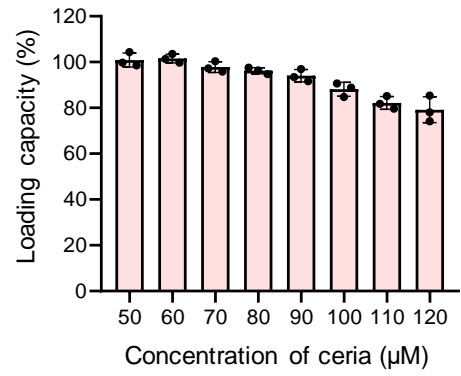

**Supplementary Fig. 7.** Loading capacity of DCNC toward ceria at different concentration of ceria.

Bars represent mean  $\pm$  SD (n=3 independent samples).

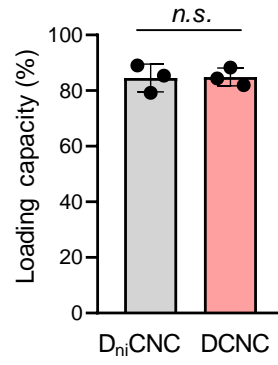

**Supplementary Fig. 8.** Loading capacity of D<sub>ni</sub>CNC and DCNC towards ceria at 100  $\mu$ M. Bars represent mean  $\pm$  SD (n=3 independent samples). (*n.s.*, no significance,  $P > 0.05$ , calculated by two-tailed unpaired t test).

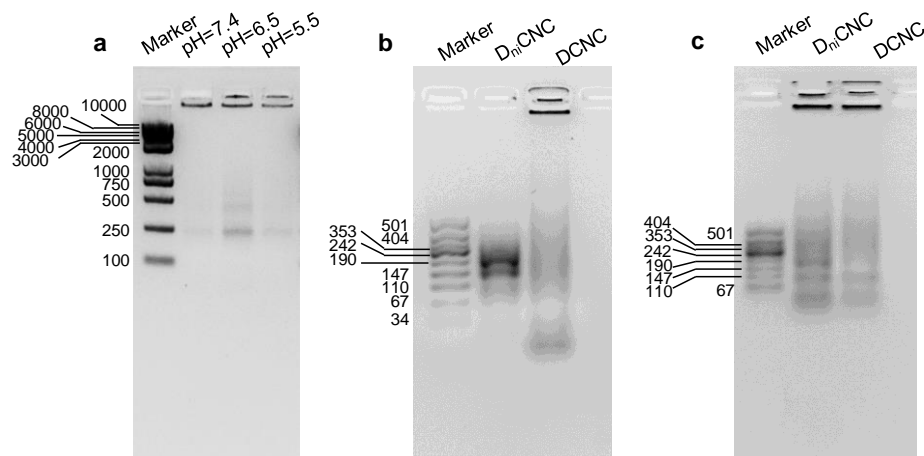

**Supplementary Fig. 9. Agarose gel electrophoresis for verifying the dissociation and reassembly of materials.** **a**, DCNCs were incubated in pH 7.4, 6.5 and 5.5 buffer for 4 h, respectively. **b**, D<sub>ni</sub>CNC and DCNC were separately incubated in pH 5.5 buffer for 4 h. **c**, D<sub>ni</sub>CNC and DCNC were separately incubated in pH 5.5 buffer and then incubated in pH 7.4 buffer.

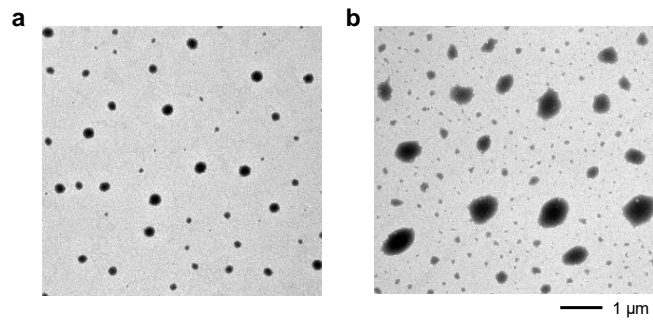

**Supplementary Fig. 10.** Representative transmission electron microscopy images of the DCNC at pH 7.4 (**a**) and the DCNC incubated from pH 5.5 to pH 7.4 (**b**).

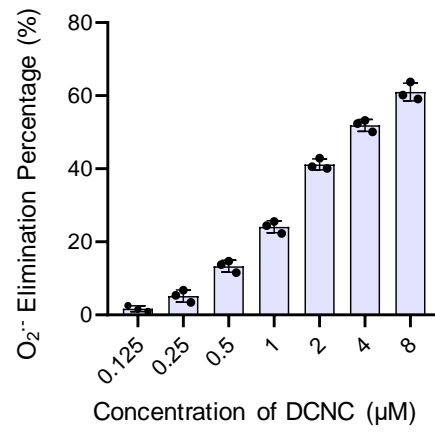

**Supplementary Fig. 11.**  $\text{O}_2^-$  elimination percentages under the different concentrations of DCNC at pH 7.4. Bars represent mean  $\pm$  SD (n=3 independent samples).

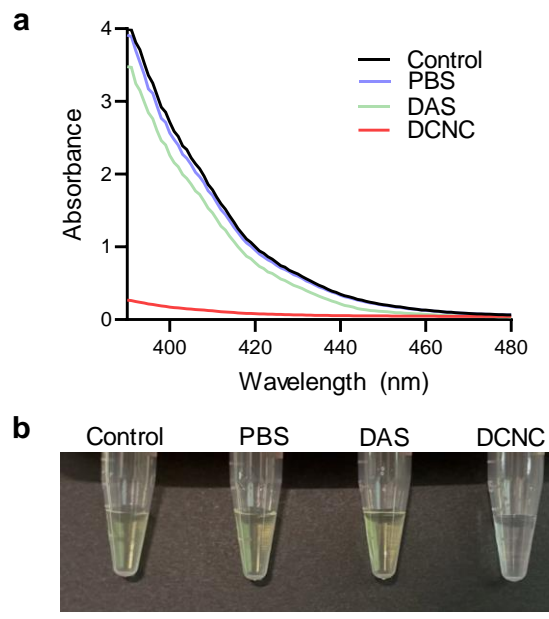

**Supplementary Fig. 12. Test of catalase-like catalytic ability.** **a**, Absorbance spectra of ammonium molybdate (AMT) after incubation with water (control), PBS, DAS and DCNC for 30 min, respectively. **b**, Photographs of AMT after incubation with water (control), PBS, DAS and DCNC for 30 min, respectively.

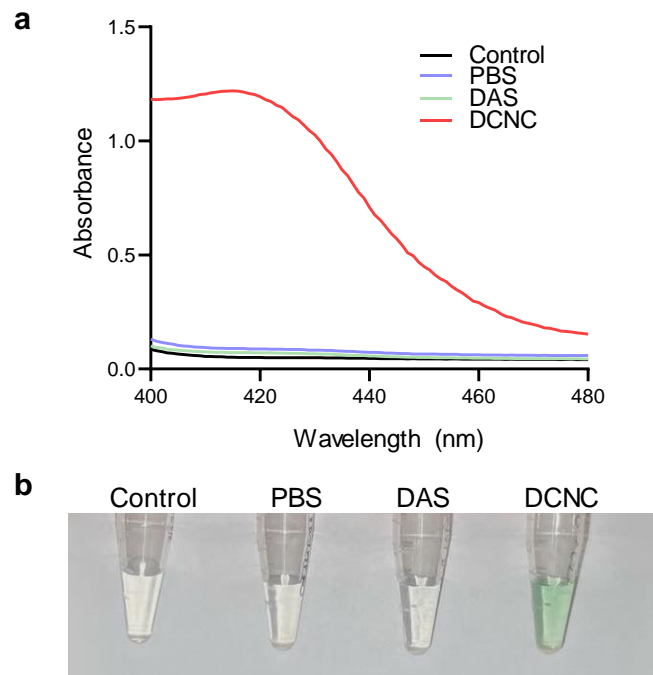

**Supplementary Fig. 13. Test of peroxidase-like catalytic ability. a,** Absorption spectra of ABTS after incubation with PBS, DAS and DCNC for 30 min, respectively. **b,** Photographs of ABTS after incubation with water (control), PBS, DAS and DCNC for 30 min, respectively.

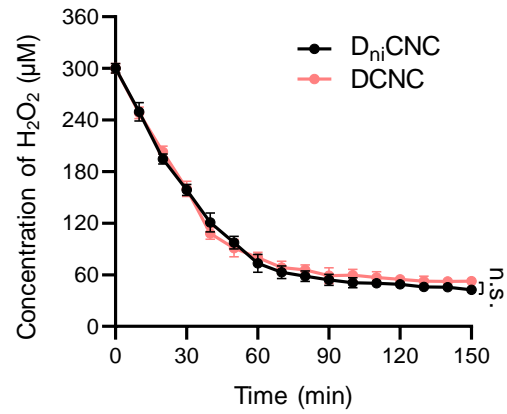

**Supplementary Fig. 14.** Decomposition of H<sub>2</sub>O<sub>2</sub> at different time points catalyzed by D<sub>ni</sub>CNC and DCNC, respectively. Bars represent mean  $\pm$  SD (n=3). (*n.s.*, no significance,  $P > 0.05$ , calculated by two-tailed unpaired t test).



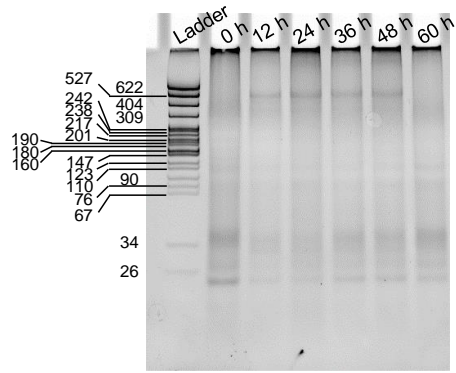

**Supplementary Fig. 15.** Polyacrylamide gel electrophoresis to analyze the stability of DCNC after incubation with 10% FBS for different time durations.

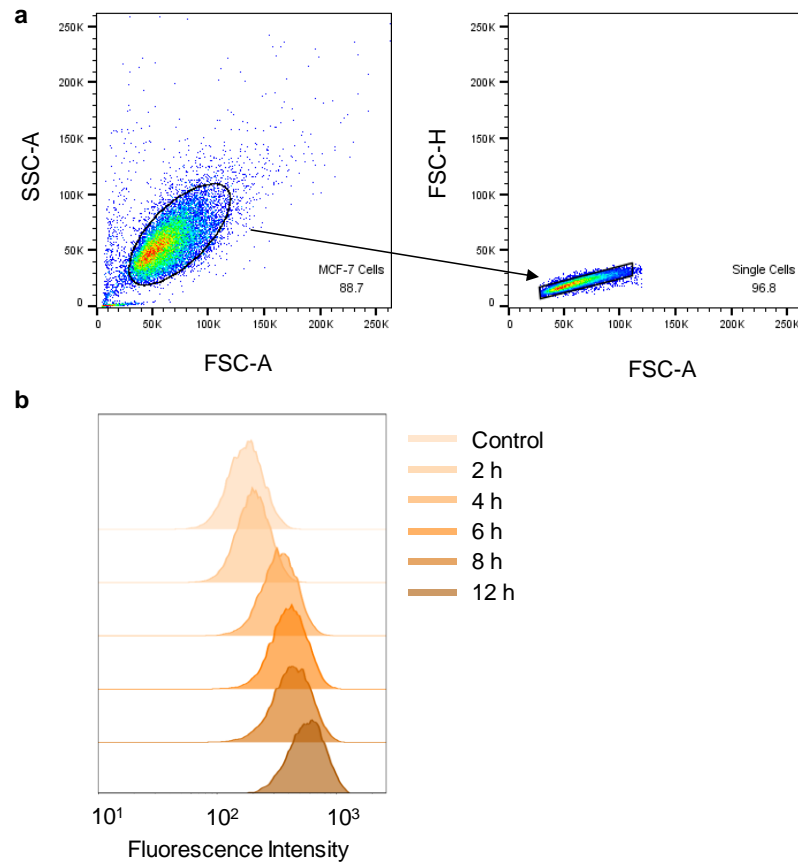

**Supplementary Fig. 16. Flow cytometry to analyze the uptake of DCNC by MCF-7 cells with time. a,** Front/side/fluorescence scatter plots showing gating process. **b,** Fluorescence intensity of MCF-7 cells incubated with Cy5-labelled DCNC for different time durations.

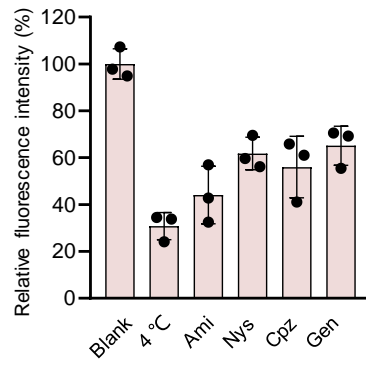

**Supplementary Fig. 17.** Quantitative statistics of the red fluorescence intensity of DCNC in the MCF-7 cells with different treatments, respectively. Ami, amiloride; Nys, nystatin; Cpz, chlorpromazine; Gen, genistein. Bars represent mean  $\pm$  SD (n=3 independent samples).

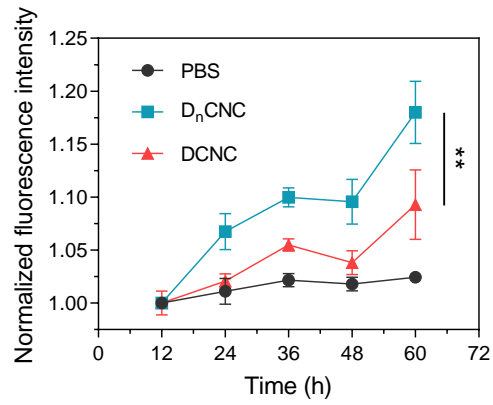

**Supplementary Fig. 18.** Escape kinetics of D<sub>n</sub>CNC and DCNC from MCF-7 cells, respectively. Bars represent mean  $\pm$  SD (n=3 independent samples). (\*\*, P<0.01, calculated by two-tailed unpaired t test).

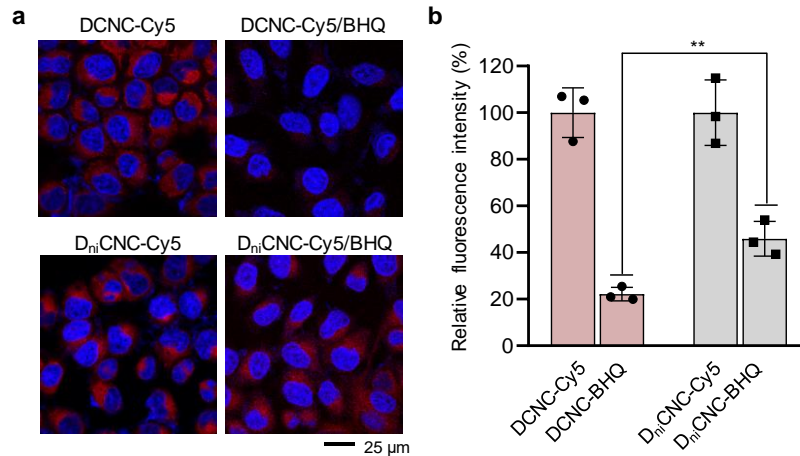

**Supplementary Fig. 19. Aggregative processes of DCNC in MCF-7 cells verified by FRET. a,** Representative fluorescence images of MCF-7 cells after incubation with DCNC and D<sub>ni</sub>CNC for 12 h, respectively. DCNC-Cy5: adding 100% Cy5-labelled DCNC; DCNC-Cy5/BHQ: adding 50% Cy5-labelled DCNC and 50% BHQ-labelled DCNC; D<sub>ni</sub>CNC-Cy5: adding 100% Cy5-labelled D<sub>ni</sub>CNC; D<sub>ni</sub>CNC-Cy5/BHQ: adding 50% Cy5-labelled D<sub>ni</sub>CNC and 50% BHQ-labelled D<sub>ni</sub>CNC. **b,** Quantitative statistics of the red fluorescence intensity in **a**. Bars represent mean  $\pm$  SD (n=3 independent samples). (\*\*, P<0.01, calculated by two-tailed unpaired t test). BHQ, black hole quencher.

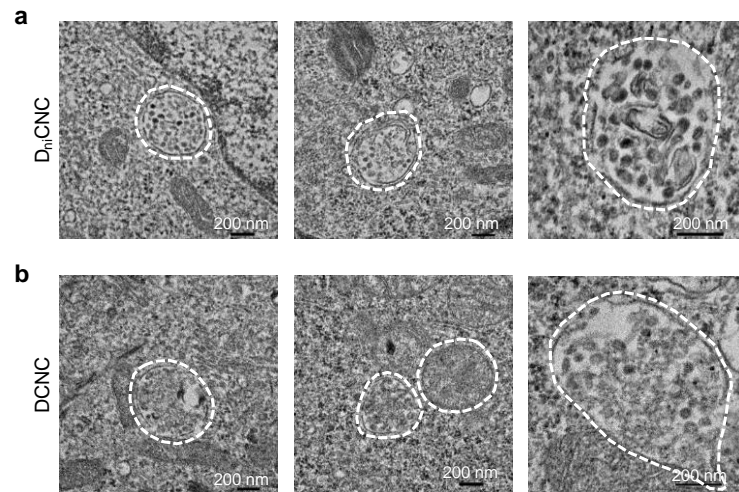

**Supplementary Fig. 20.** TEM images of MCF-7 cells that were treated with D<sub>ni</sub>CNC (**a**) and DCNC (**b**) for 6 h, respectively. The white circles indicated lysosomes.

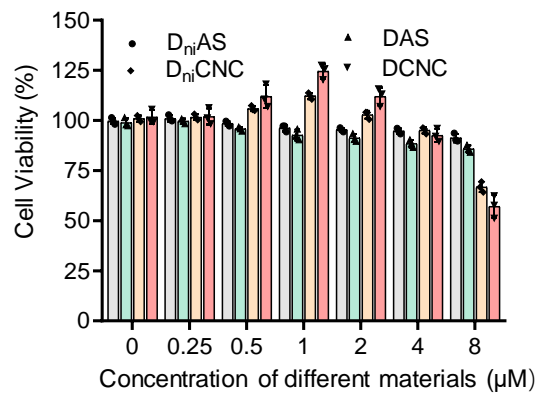

**Supplementary Fig. 21.** Cell viability of MCF-7 cells after incubation with different concentrations of materials for 24 h, respectively. Bars represent mean  $\pm$  SD (n=3 independent samples).

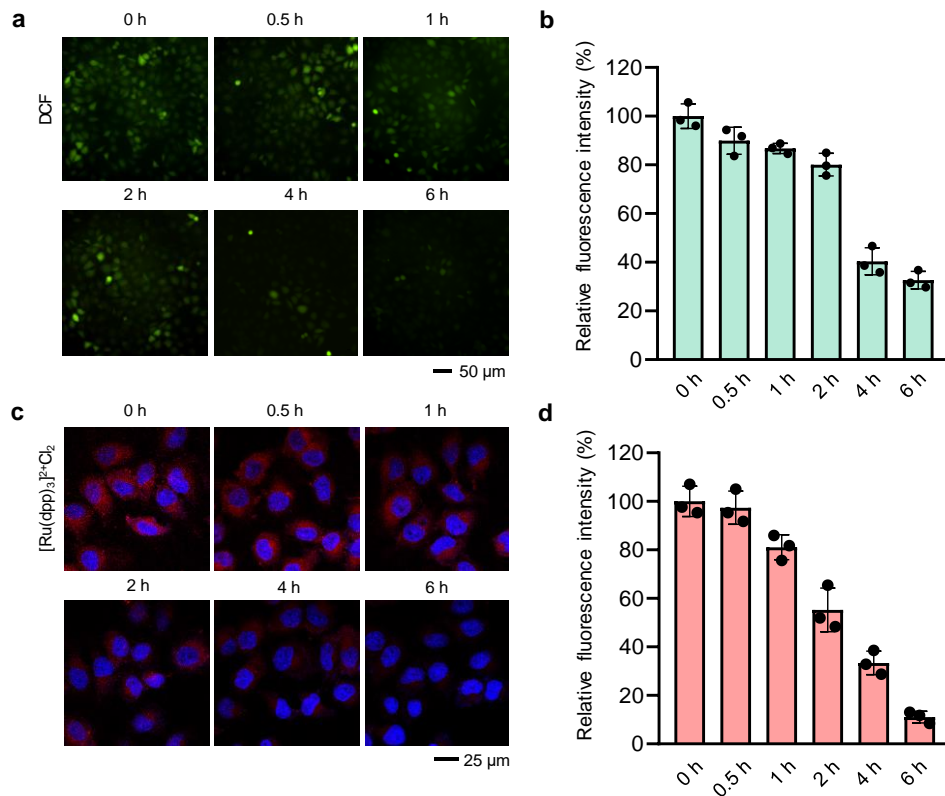

**Supplementary Fig. 22. Intracellular effects of DCNC.** **a**, Representative fluorescence microscopy images of intracellular ROS level in MCF-7 cells incubated with DCNC for varied time durations. **b**, Quantitative statistics of fluorescence intensity in **a**. Bars represent mean  $\pm$  SD (n=3 independent samples). **c**, Representative confocal microscopy images of intracellular  $\text{O}_2$  generation in MCF-7 cells detected by  $[\text{Ru}(\text{dpp})_3]^{2+}\text{Cl}_2$ . **d**, Quantitative statistics of the red fluorescence intensity in **c**. Bars represent mean  $\pm$  SD (n=3 independent samples).



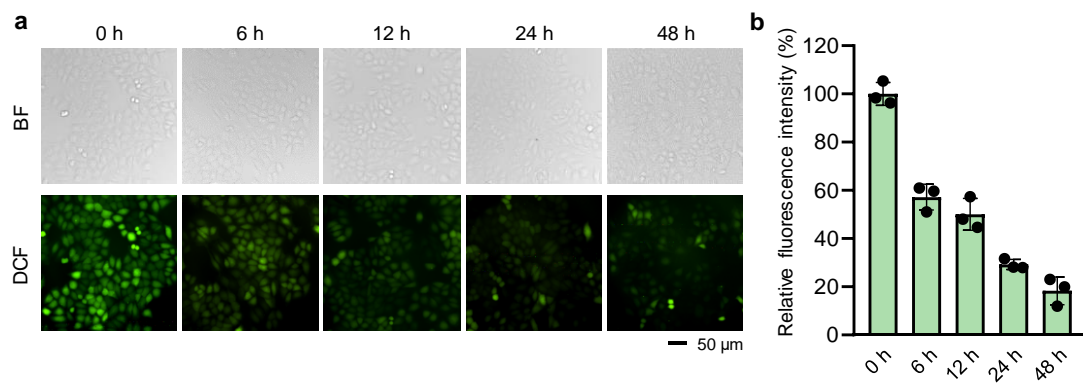

**Supplementary Fig. 23. Intracellular ROS levels measured by DCFH-DA fluorescent probe.**

**a**, Representative fluorescence microscopy images of MCF-7 cells treated with 1 mM  $H_2O_2$  and then incubated with DCNC for different time durations. **b**, Quantitative statistics of fluorescence intensity in **a**. Bars represent mean  $\pm$  SD (n=3 independent samples).

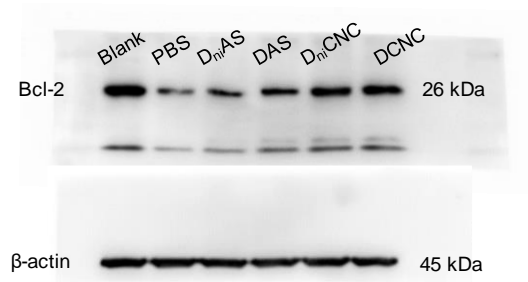

**Supplementary Fig. 24.** Expression level of Bcl-2 analyzed by western blot.  $\beta$ -actin was set as the control.

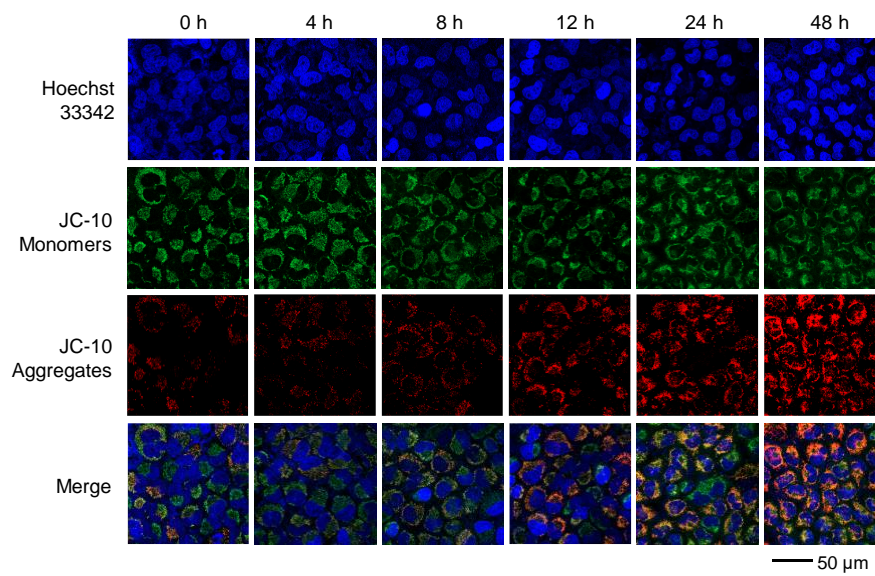

**Supplementary Fig. 25.** Representative confocal microscopy images of JC-10 staining in the MCF-7 cells treated with 1 mM H<sub>2</sub>O<sub>2</sub> and then incubated with DCNC for different time durations.

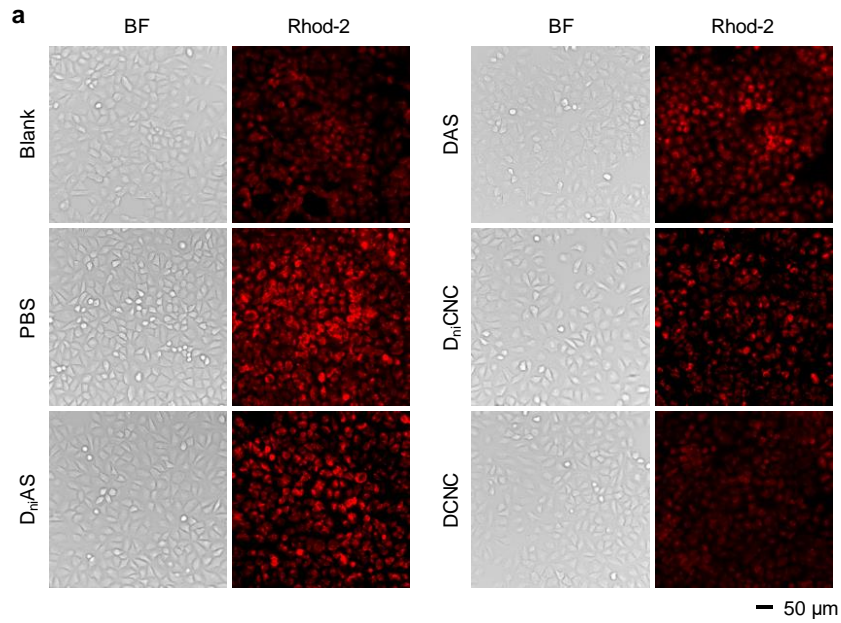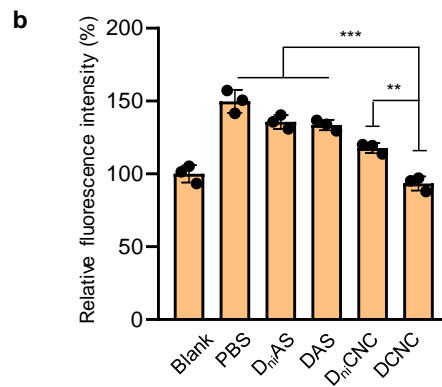

**Supplementary Fig. 26. Intracellular  $\text{Ca}^{2+}$  level in the MCF-7 cells incubated with different materials.** **a**, Representative fluorescence microscopy images of MCF-7 cells incubated with different materials, respectively, and then stained by Rhod-2. **b**, Quantitative statistics of fluorescence intensity in **a**. Bars represent mean  $\pm$  SD ( $n=3$  independent samples). (\*\*,  $P<0.01$ ; \*\*\*,  $P<0.001$ , calculated by two-tailed unpaired t test).

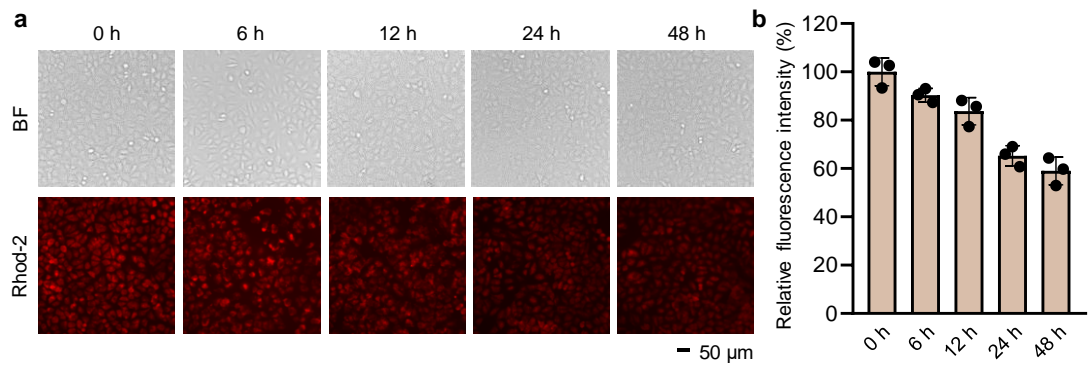

**Supplementary Fig. 27. Intracellular  $\text{Ca}^{2+}$  level in the MCF-7 cells incubated with DCNC for different time durations.** **a**, Representative fluorescence microscopy images of MCF-7 cells incubated with DCNC for different time durations and then stained by Rhod-2. **b**, Quantitative statistics of fluorescence intensity in **a**. Bars represent mean  $\pm$  SD (n=3 independent samples).

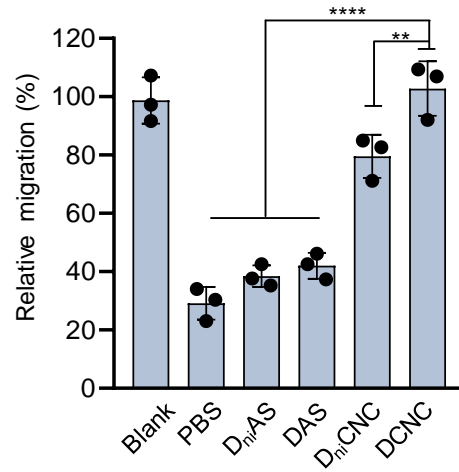

**Supplementary Fig. 28.** Quantitative statistics of the migrating MCF-7 cells treated with different materials in a Transwell cell invasion device. Bars represent mean  $\pm$  SD (n=3 independent samples). (\*\*, P<0.01; \*\*\*\*, P<0.0001, calculated by two-tailed unpaired t test).

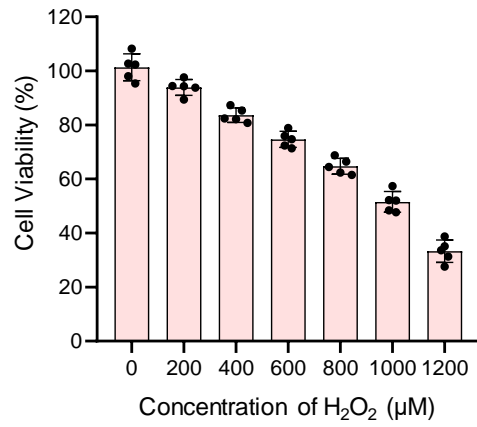

**Supplementary Fig. 29.** Cell viability of MCF-7 cells after incubation with different concentrations of H<sub>2</sub>O<sub>2</sub> for 2 h. Bars represent mean ± SD (n=3 independent samples).

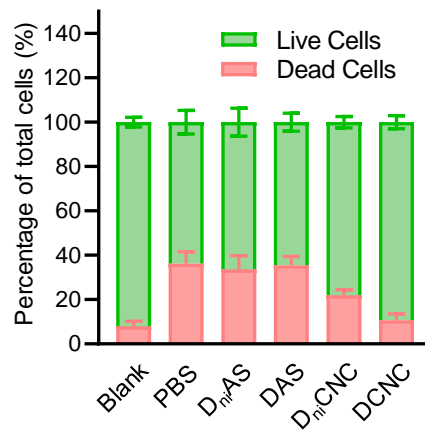

**Supplementary Fig. 30.** Statistical analysis of the live and dead MCF-7 cells after incubation with different materials, respectively. Bars represent mean  $\pm$  SD (n=3 independent samples).



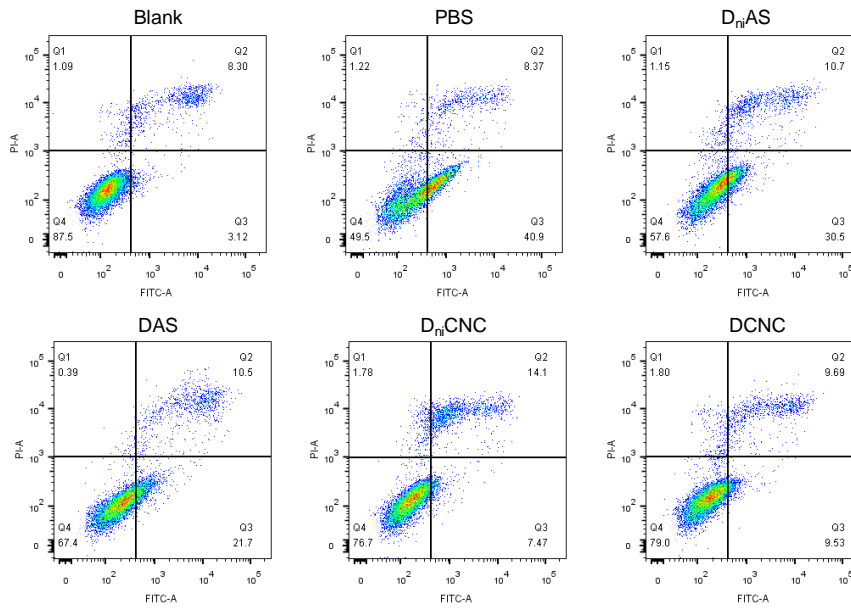

**Supplementary Fig. 31.** Flow cytometry analysis of cell apoptosis. MCF-7 cells were stained with Annexin V-FITC/PI after incubation with different materials.

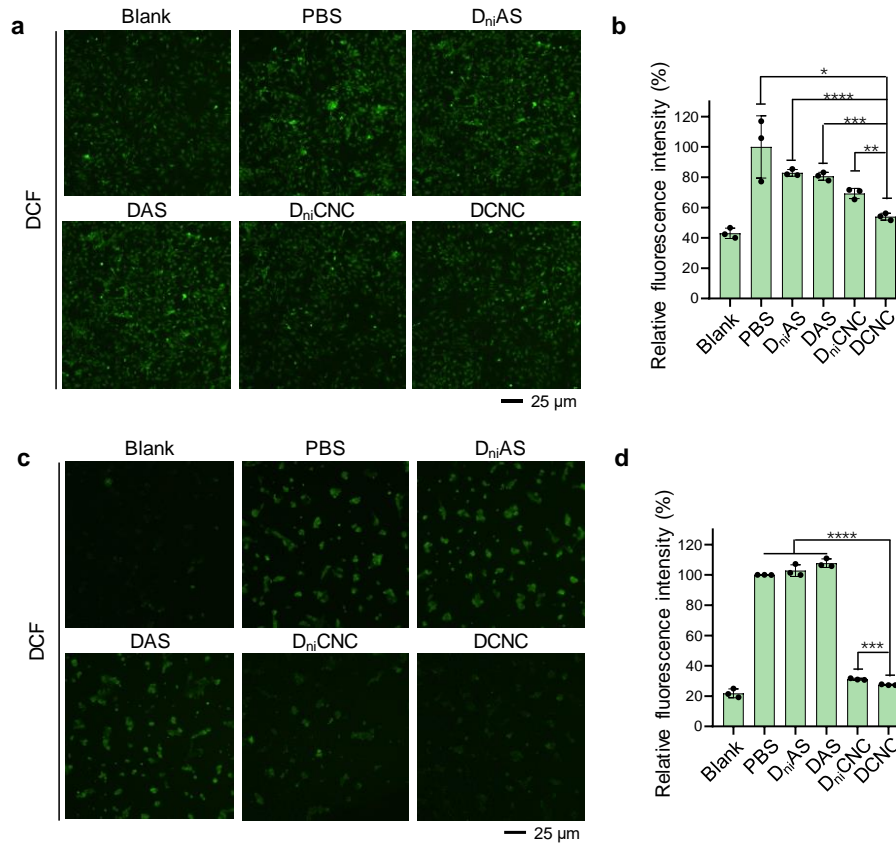

**Supplementary Fig. 32. ROS regulation effects of DCNC in H9C2 cells and BEAS-2B cells.**

**a**, Representative fluorescence microscopy images showing the ROS levels in H9C2 cells measured with DCFH-DA fluorescent probe after incubation with different materials (PBS, D<sub>ni</sub>AS, DAS, D<sub>ni</sub>CNC and DCNC, respectively) and treatment of H<sub>2</sub>O<sub>2</sub>. The green signal was from DCF.

**b**, Mean fluorescence intensity of DCF in (a). Bars represent mean ± SD (n=3 independent samples). (\*, P<0.05; \*\*, P<0.01; \*\*\*, P<0.001; \*\*\*\*, P<0.0001, calculated by two-tailed unpaired t test).

**c**, Representative fluorescence microscopy images showing the ROS levels in BEAS-2B cells measured with DCFH-DA fluorescent probe after incubation with different materials (PBS, D<sub>ni</sub>AS, DAS, D<sub>ni</sub>CNC and DCNC, respectively) and treatment of H<sub>2</sub>O<sub>2</sub>.

**d**, Mean fluorescence intensity of DCF in (c). Bars represent mean ± SD (n=3 independent samples). (\*\*\*, P<0.001; \*\*\*\*, P<0.0001, calculated by two-tailed unpaired t test).

**Supplementary Table 1.** Oligonucleotide sequences used in this study.

| Name                    | Sequence (5' to 3')                                          | Notes                                    |
|-------------------------|--------------------------------------------------------------|------------------------------------------|
| X-1                     | 5'- <b>CCTCCTCTCTCC</b><br>GCGTGGATAGTAGACTCGCACAATTGCATC-3' |                                          |
| X-2                     | 5'- <b>CCTCCTCTCTCC</b><br>GATGCAATTGTGCGACAGGTACATTTGCTC-3' | Synthesis of X-shaped DNA                |
| X-3                     | 5'- <b>CCTCCTCTCTCC</b><br>GAGCAAATGTACCTGCAGCAGGAGTCAGTG-3' |                                          |
| X-4                     | 5'- <b>CCTCCTCTCTCC</b><br>CACTGACTCCTGCTGGTCTACTATCCACGC-3' |                                          |
| Y <sub>i-motif</sub> -1 | 5'- <b>GGAGAGAGGAGG</b><br>CTGGTTCACGACTCCATGACCGACGAAG-3'   |                                          |
| Y <sub>i-motif</sub> -2 | 5'- <b>GGAGAGAGGAGG</b><br>CTTCGTCGGTCATGTGGATCCTGACTCG-3'   | Synthesis of Y <sub>i</sub> -shaped DNA  |
| Y <sub>i-motif</sub> -3 | 5'- <b>CCCCTAACCCC</b><br>CGAGTCAGGATCCAGAGTCGTGAACCAG-3'    |                                          |
| Y <sub>ni</sub> -1      | 5'- <b>GGAGAGAGGAGG</b><br>CTGGTTCACGACTCCATGACCGACGAAG-3'   | Synthesis of Y <sub>ni</sub> -shaped DNA |
| Y <sub>ni</sub> -2      | 5'- <b>GGAGAGAGGAGG</b><br>CTTCGTCGGTCATGTGGATCCTGACTCG-3'   |                                          |
| Y <sub>ni</sub> -3      | 5'- <b>AAAAAAAAAAAA</b><br>CGAGTCAGGATCCAGAGTCGTGAACCAG-3'   |                                          |

Green letters: Sticky ends of X-shaped DNA, complementary to the sticky ends of Y-shaped DNA (Blue letters); Blue letters: Sticky ends of Y-shaped DNA, complementary to the sticky ends of X-shaped DNA (Green letters); Red letters: i-motif sequence of Y-shaped DNA.
